# Supplementary material
Source: PubMed Central journal article supplement (PMC4313816)
Supplement: pnas.201415020SI.pdf [file pnas.201415020SI.pdf]

# Supporting Information

Ma et al. 10.1073/pnas.1415020112

## SI Materials and Methods

**Clonal Analysis.** *wt*s mutant clones were generated by crossing *hs-FLP*; *ubi-GFP*, FRT82B/TM6B with *wt*s<sup>XI</sup> FRT82B/TM6B. Flip-out ectopic expression clones were generated by crossing *UAS-transgenes* with *y w hs-FLP;act > y<sup>+</sup>>Gal4 UAS-GFP*. Clones were induced at the second instar: heat shock for 30 min at 37 °C 48–72 h after egg laying (AEL); dissection was performed 36 h or 72 h after clone induction.

Clone size measurements were done as follows: we randomly picked up four clones from each wing disk, excluding clones along the dorsal/ventral boundary (low Yki activity due to reduced tension), and four wing discs were examined for each genotype. In total, 16 clones of indicated genotype were picked in double-blind experiments, and the pixels of each clone were measured using Photoshop software (Adobe), and the graphs were generated using GraphPad Prism 5.

**qRT-PCR.** Total RNA was extracted from wing discs of indicated genotype or culture S2 cells using PureLink RNA Mini kit (Ambion); cDNA was synthesized using PrimeScript RT Master mix (TaKaRa); and quantitative PCR was performed using SYBR Premix Ex Taq II (TaKaRa) on a Stratagene MX3000P system (Stratagene). The following primer sequences were used for RT-PCR:

*tublin*-FW: GCTGTTCCACCCGAGCAGCTGATC  
*tublin*-RV: GGCGAACTCCAGCTTGGACTTCTTGC  
*Rho1*-FW: GTGGATGGCAAACAGGTGGAGC  
*Rho1*-RV: GCGAATCGGGTGAATCCACTGAG.

**Luciferase Reporter Assay.** The *luciferase* reporters were generated through cloning the dissected elements of Rho1 first intron (E1, E2, and E3 in Fig. 4I) into KpnI/XhoI sites of *pGL3-Basic* Vector containing the hsp70 basal promoter. For luciferase assays, S2 cells were transfected with the above luciferase reporters and *copia-renilla* reporter in 12-well plates together with yki-HA-expressing pAc5.1/V5-HisB expressing plasmids. Cells were incubated for 36 h after transfection. Luciferase assays were performed using the Dual-Luciferase Reporter Assay system (Promega). Dual-luciferase measurements were performed using FlexStation 3 (Molecular Devices).

**Western Blotting and ChIP.** For Western blot analysis, 20 third instar wing discs were lysed in 1× SDS/PAGE sample loading buffer (Beyotime) and proceeded by the standard Western blot protocol. Proteins were probed with the following primary antibodies: anti-Rho1 (1:1,000; DSHB) and β-tubulin (1:3,000; CMC Scientific). After incubation with secondary antibodies (1:3,000; CST), signals were visualized by enhanced chemiluminescence (Beyotime). Chromatin immunoprecipitation was carried out as described in the protocol of the Magna ChIP G Tissue kit (Millipore). Transient transfections were performed with equal amounts of DNA (2.5 μg per plasmids) using Effectene transfection reagent (Qiagen) for S2 cells in 100 mm × 20 mm. HA-Tag (CMCTAG), Sd (a kind gift from Kirsten A. Guss, Dickinson College, Carlisle, PA), and mouse IgG (CST) were used for immunoprecipitation of ChIP assay.

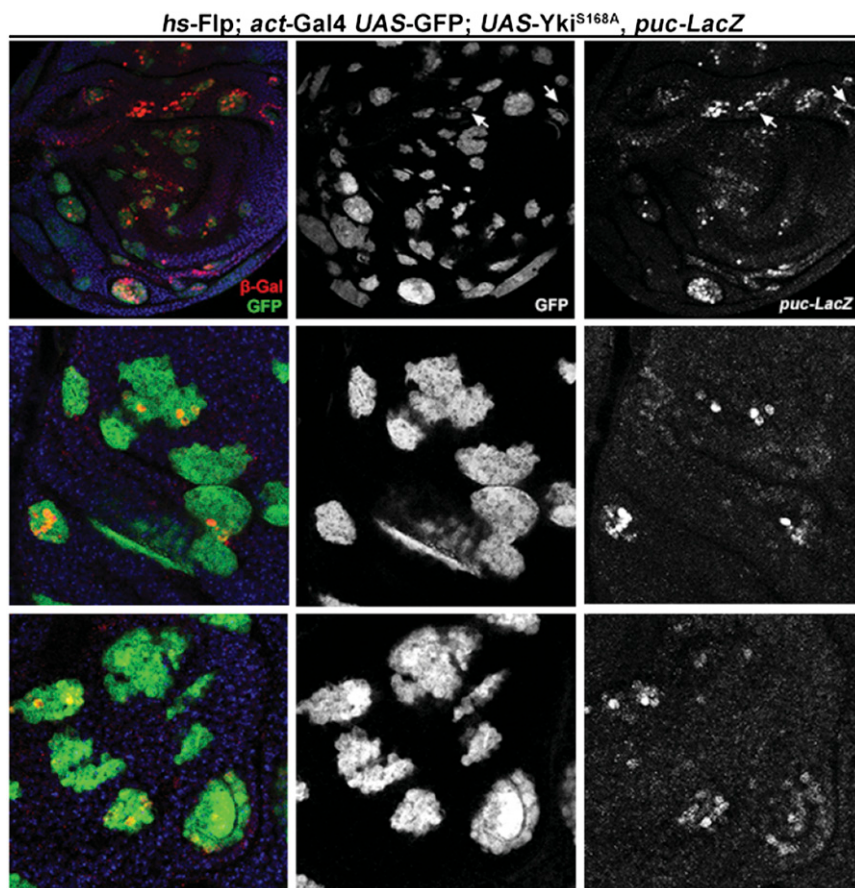

**Fig. S1.** Yki-expressing clones induces JNK activation throughout the wing disk. Yki<sup>S168A</sup>-expressing Flp-out clones up-regulate *puc* transcription throughout the wing disk in an autonomous manner, although occasionally, nonautonomous JNK activation is observed in surrounding cells (first row, indicated by white arrow).

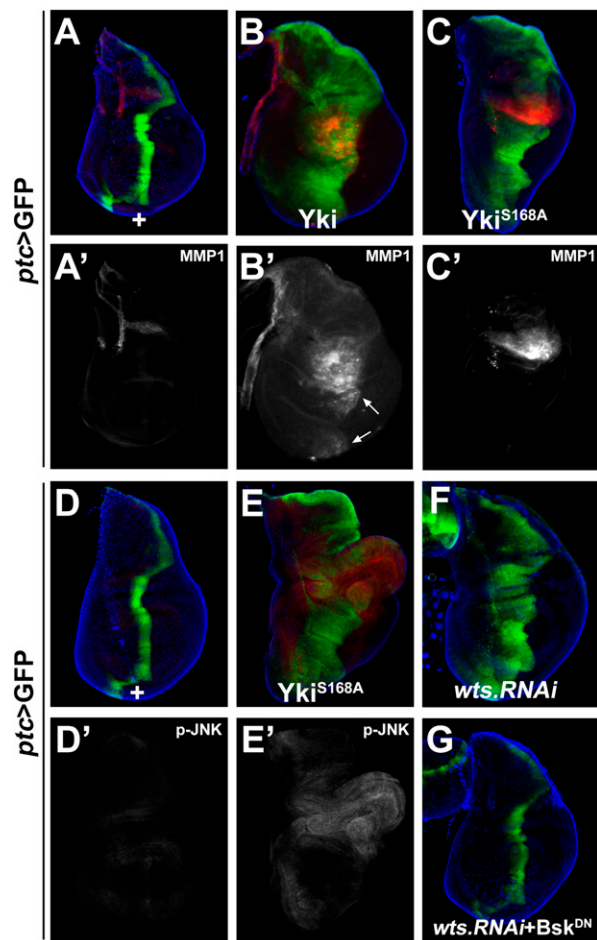

**Fig. S2.** Ectopic Yki expression induces JNK activation. (A–E) Ectopic Yki or Yki<sup>S168A</sup> expression driven by *ptc*-Gal4 induces MMP1 expression (A–C) and JNK phosphorylation (D and E). (F and G) Blocking JNK signal via expressing Bsk<sup>DN</sup> suppresses loss of *wts*-induced overgrowth phenotype.

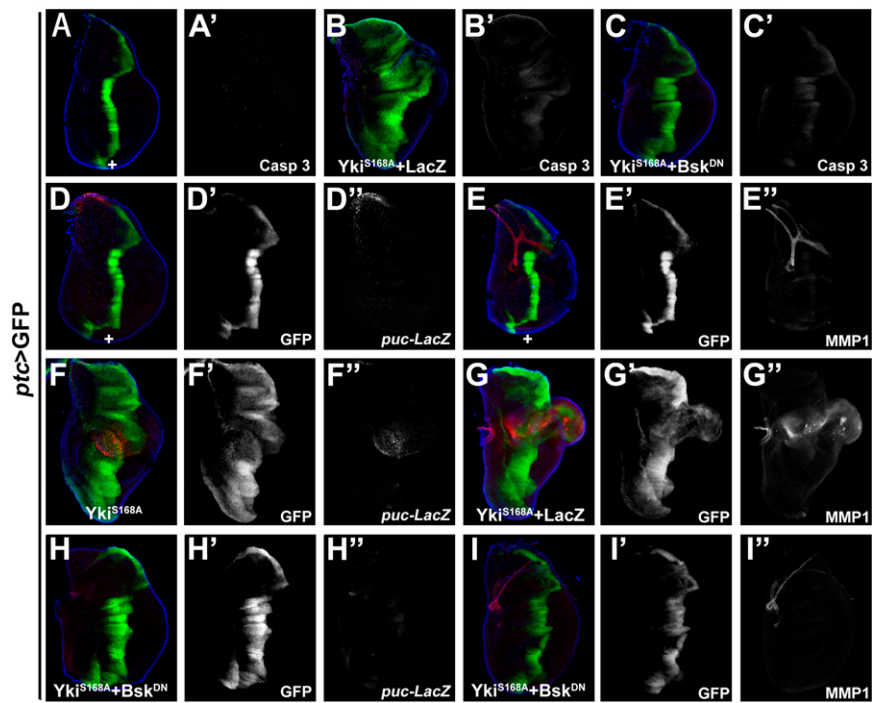

**Fig. S3.** Yki expression induces JNK-dependent target gene expression. (A–C) Third instar wing discs stained with antiactive caspase 3 antibody. Blocking JNK signaling fails to suppress Yki<sup>S168A</sup>-induced apoptosis. (D–I) Third instar wing discs stained with antibodies against  $\beta$ -Gal (D, F, and H) or MMP1 (E, G, and I). Yki<sup>S168A</sup>-induced *puc-LacZ* and MMP1 expression (F and G) were both suppressed by Bsk<sup>DN</sup> (H and I).

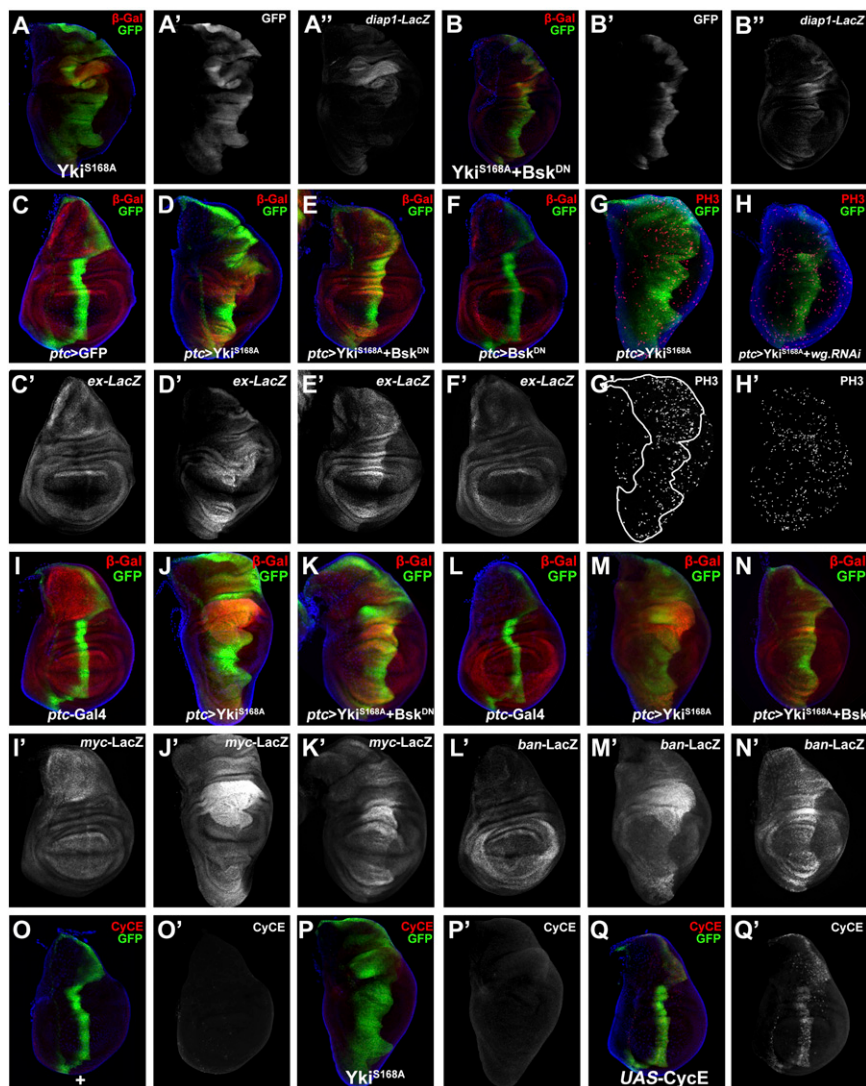

**Fig. S4.** JNK is dispensable for Yki-induced *diap1*, *ex*, *dmyc*, and *ban* expression. Third instar wing discs stained with antibodies against  $\beta$ -Gal (A–F and I–N), PH3 (G and H), or CycE (O–Q). (A–F) Yki<sup>S168A</sup>-induced *diap1* and *ex* transcription (A and D) remained unchanged by coexpressing Bsk<sup>DN</sup> (B and E). (G and H) Coexpression of a *wg* RNAi dramatically suppressed Yki-induced overgrowth and proliferation, as indicated by PH3 staining. (I–N) Blocking JNK activity cannot impede Yki-induced *dmyc* (I–K) and *ban* (L–N) transcription. (O–Q) Compared with control (O), Yki<sup>S168A</sup> expression does not induce CycE activation (P). As a positive control, CycE is up-regulated in *ptc*-Gal4 UAS-CycE wing discs (Q).

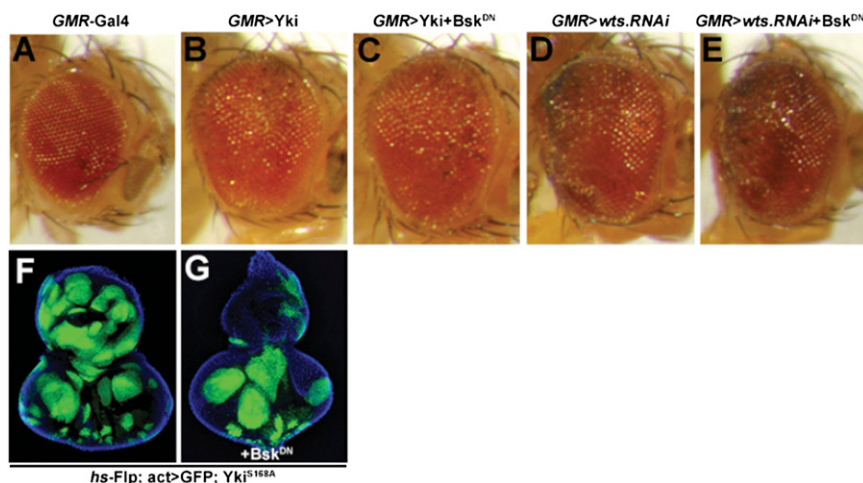

**Fig. S5.** JNK signaling is dispensable for Yki-induced overgrowth in the developing eye. (A–E) Light micrographs of *Drosophila* adult eyes are shown. Compared with control (A), overexpression of Yki or knock-down wts under *GMR* promoter results in overgrowth of adult eye (B and D), both of which remains unaffected by corepression of Bsk<sup>DN</sup> (C and E). (F and G) Third instar eye-antennal discs are shown. Blocking JNK activity does not suppress Yki<sup>S168A</sup>-induced clone overgrowth.

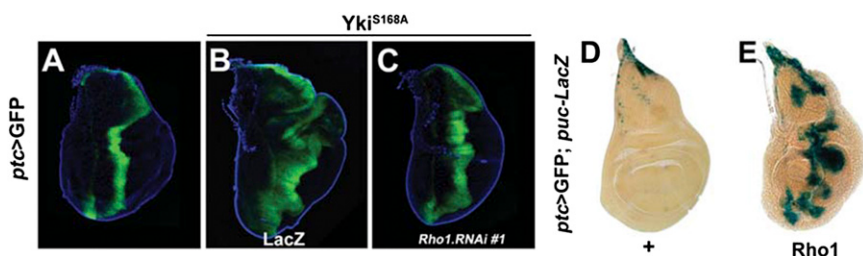

**Fig. S6.** Rho1 is required for Yki-induced overgrowth. (A–C) *ptc* > Yki<sup>S168A</sup>-induced expansion of GFP<sup>+</sup> region (B) was suppressed by another independent *Rho1* RNAi line (C). (D and E) X-Gal staining of third instar wing discs. Compared with the controls (D), *ptc* > Rho1 induces strong *puc* transcription along the A-P boundary (E).

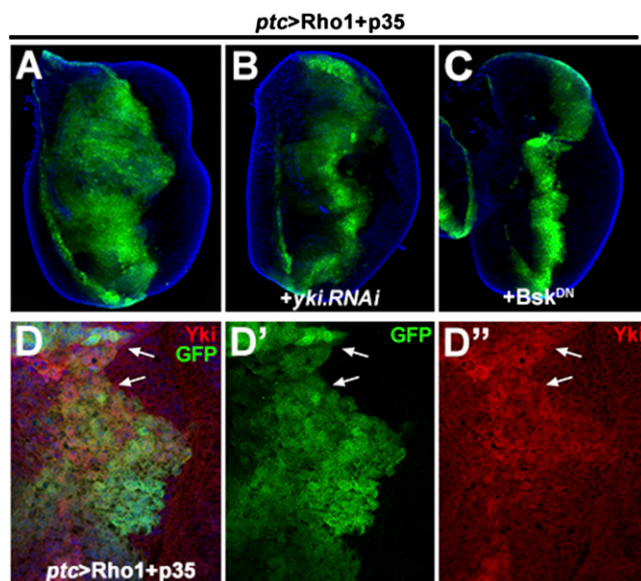

**Fig. S7.** Both Yki and JNK signaling are required for Rho1-induced growth. Third instar wing disk are shown. (A–C) Reducing Yki (B) or JNK (C) activity dramatically suppresses Rho1-induced overgrowth when cell death is compromised. (D) Increased Yki nuclear accumulation was observed in Rho1-expressing cells when cell death is inhibited.

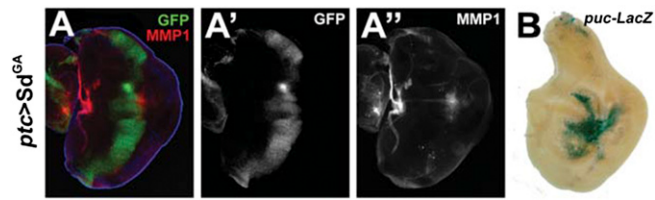

**Fig. S8.**  $Sd^{GA}$  overexpression induces JNK activation. Third instar wing discs stained with MMP1 (A) or X-Gal (B). Expression of an activated form of Sd ( $Sd^{GA}$ ) up-regulates MMP1 (A) and *puc-LacZ* expression (B).

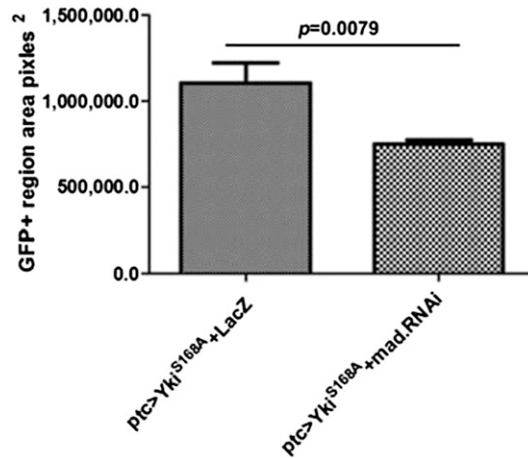

**Fig. S9.** *mad* is required for Yki-induced overgrowth. Statistical analysis of GFP<sup>+</sup> regions shown in Fig. 4 A and C. Error bars are +SD; two-tailed, unpaired Student's *t* test.
